# Supplementary material for: Clinical, biochemical and genetic spectrum of 70 patients with ACAD9 deficiency: is riboflavin supplementation effective?
Source: Springer Nature journal article supplement (doi:10.1186/s13023-018-0784-8), 2018-07-19

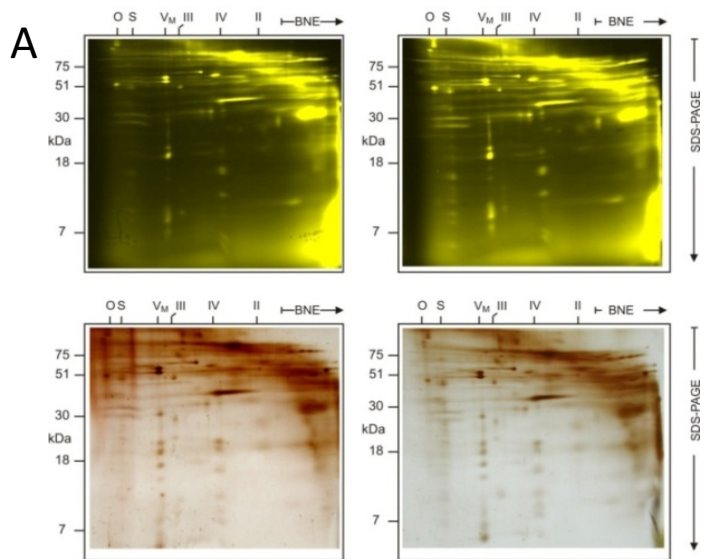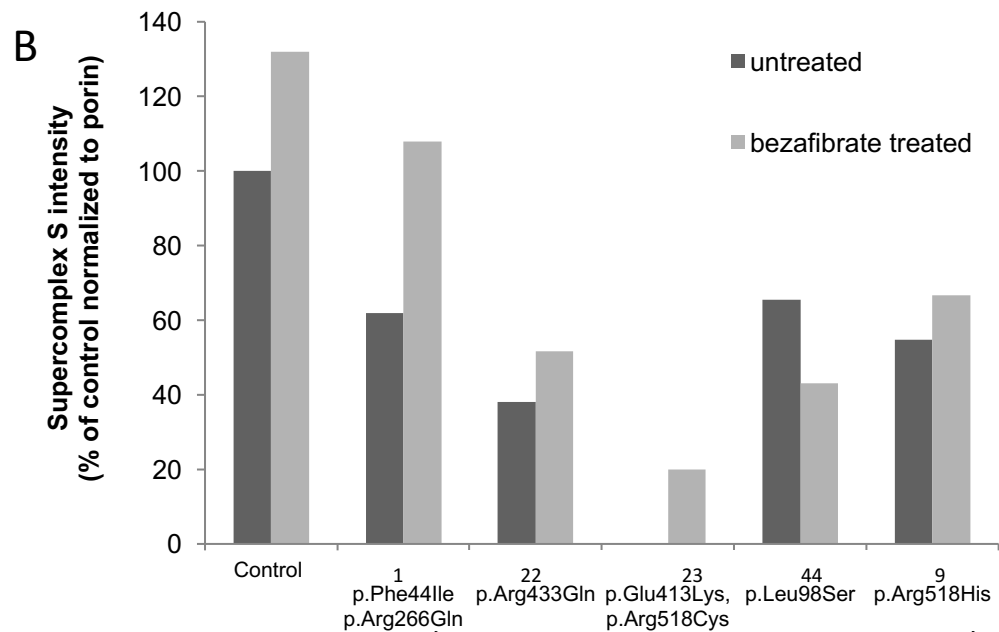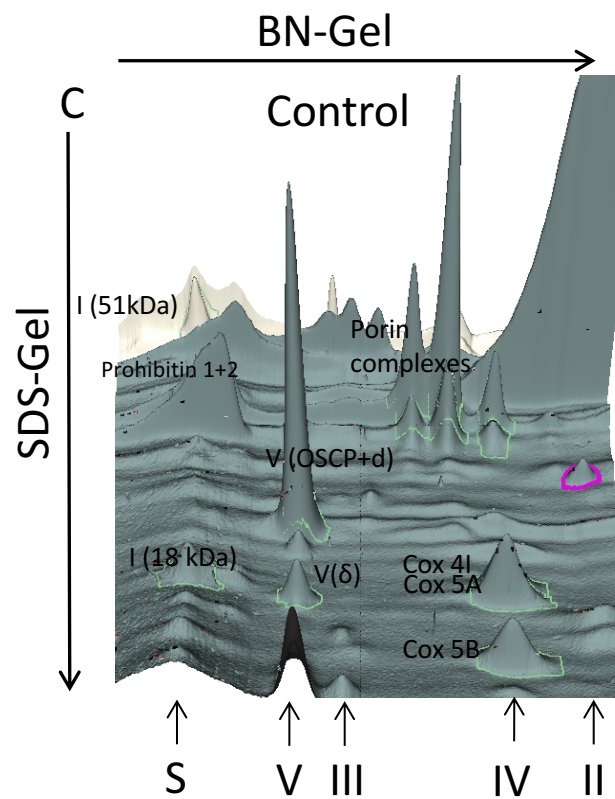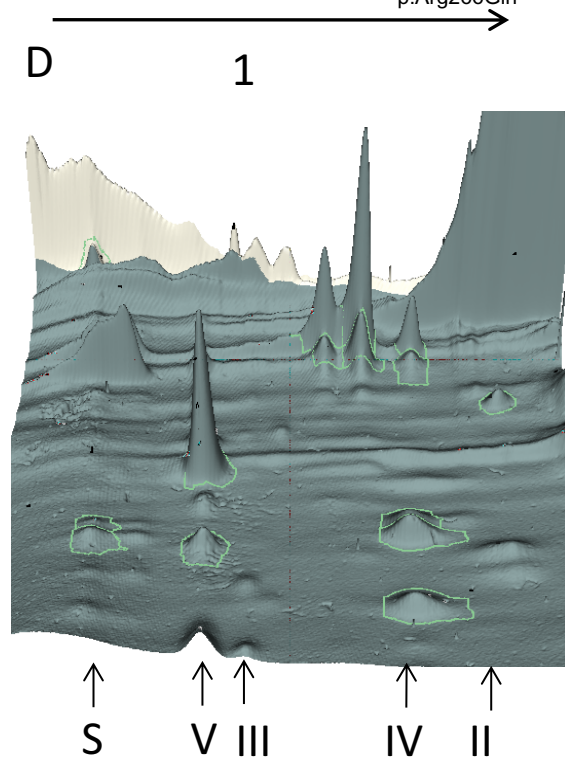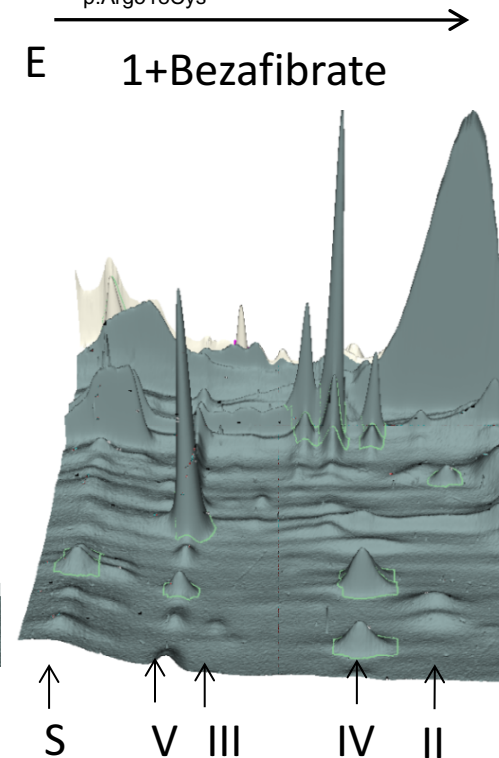

Supplement: MOESM5 [file 15964272]
